# Supplementary material
Source: Research Square preprint supplement (doi:10.21203/rs.3.rs-9075059/v1)
Supplement: Supplementary file 1 [file 99019ad8347199345486663d.xlsx]

## Sheet: Sheet1
	Supplementary materials for paper titled: “Assessment of Medical Students’ Perception and Knowledge Toward Artificial Intelligence and its Medical Applications among a Sample of New Giza University Students: A Cross-sectional Study.”
	Mohamed Adel Elshobasy, Youssef Wafik Aziz, Mohamed Saad Abdelnaby, Muhammad Ali Rushdi, Reem Saber Mohamed, Omar Mohammed Alhagrasi, Mariam Megahed Tolba, Dina Nabih Boulos,Sherif Essam Eldeib.
	Table (S1) Preferred monthly time allocation for studying AI topics.
	The maximum amount of time I would like to spend exploring the topic of AI in medicine per month is..	N(%)
	<1 hour*	27(8.1%)
	1 hour	42(12.6%)
	2 hours	53(15.9%)
	3 hours	69(20.7%)
	4 hours	52(15.6%)
	5 hours	46(13.8%)
	More than 5 hours	44(13.2%)
	3hrs or less	192(57.5%)
	More than 3	142(42.5%)
	Table (S2) Association between participants’ gender and their KAPS towards AI.
	Statement	Likert response	Gender
			Male n=149 (100%)	Female n=195 (100%)	P value
	AI will take on a significant role in medicine during my lifetime	Agree	135 (90.6%)	165 (89.1%)	0.885
		Neither agree nor disagree	9 (6%)	12 (6.4%)
		Disagree	5 (3.3%)	8 (4.3%)
	I am excited about using AI tech as a future physician	Agree	113 (75.8%)	125 (67.5%)	0.167
		Neither agree nor disagree	25 (16.7%)	36 (19.4%)
		Disagree	11 (7.3%)	24 (12.9%)
	I understand AI concepts like: CNN Cross Validation, ROC AUC, Hyperparameters, Deep learning, Hidden Layers, etc.	Agree	26 (17.4%)	20 (10.8%)	0.158
		Neither agree nor disagree	23 (15.4%)	25 (13.5%)
		Disagree	100 (67.1%)	140 (75.6%)
	I can list some examples of recent clinically relevant	Agree	39 (29.1%)	33 (17.8%)	0.183
		Neither agree nor disagree	25 (16.7%)	35 (18.9%)
		Disagree	85 (57%)	117 (63.2%)
	I can list the strengths/benefits of using AI in medicine	Agree	109 (73.1%)	129 (69.7%)	0.722
		Neither agree nor disagree	24 (16.1%)	36 (19.4%)
		Disagree	16 (10.7%)	20 (10.8%)
	I can list the weaknesses/pitfalls of using AI in medicine.	Agree	104 (69.7%)	134 (72.4%)	0.868
		Neither agree nor disagree	28 (18.7%)	32 (17.2%)
		Disagree	17 (11%)	19 (10.2%)
	It's hard to understand and approach AI because of media sensationalism.	Agree	76 (51%)	103 (55.6%)	0.031
		Neither agree nor disagree	49 (32.8%)	69 (37.2%)
		Disagree	24 (16.1%)	13 (7%)
	I can separate “Hype” AI articles vs clinically relevant AI articles.	Agree	73 (48.9%)	88 (47.5%)	0.38
		Neither agree nor disagree	44 (29.5%)	46 (24.8%)
		Disagree	32 (21.4%)	51 (27.5%)
	I am worried about the ethics of using AI in medicine	Agree	90 (60.4%)	141 (76.2%)	0.001
		Neither agree nor disagree	33 (22.1%)	33 (17.8%)
		Disagree	26 (17.4%)	11 (5.9%)
	Some training on AI concepts and related topics during medical school can beuseful for my future career	Agree	129 (86.5%)	164 (88.6%)	0.092
		Neither agree nor disagree	18 (12%)	13 (7%)
		Disagree	2 (1.3%)	8 (4.3%)
	My school offers resources if I want to explore the topic of AI in medicine	Agree	21 (14%)	41 (22.1%)	0.147
		Neither agree nor disagree	61 (40.9%)	64 (34.5%)
		Disagree	67 (44.9%)	80 (43.2%)
	I want to learn what medical students should know about AI in medicine	Agree	128 (85.9%)	176 (95.1%)	0.014
		Neither agree nor disagree	14 (9.3%)	16 (8.6%)
		Disagree	7 (4.6%)	3 (1.6%
	Learning the relevant topics of AI in medicine will significantly detract me from my medical school curriculum.	Agree	44 (29.5%)	52 (28.1%)	0.918
		Neither agree nor disagree	51 (34.2%)	62 (33.5%)
		Disagree	54 (36.2%)	71 (38.3%)
	Table (S3) Association between participants’ academic year and their KAPs towards AI.
	Statement	Likert response	Akademic year
			2nd year n=100 (100%)	3rd year n=52 (100%)	4rth year n=56 (100%)	Final year n=126 (100%)	P value
	AI will take on a significant role in medicine during my lifetime	Agree	85 (85%)	48 (92%)	50 (89.3%)	117 (92.9%)	0.488
		Neither agree nor disagree	9 (9%)	2 (3.8%)	3 (5.4%)	7 (5.6%)
		Disagree	6 (6%)	2 (3.8%)	3 (5.4%)	2 (1.6%)
	I am excited about using AI tech as a future physician	Agree	70 (70%)	33 (63.5%)	35 (62.5%)	100 (79.4%)	0.22
		Neither agree nor disagree	18 (18%)	13 (25%)	14 (25%)	16 (12.7%)
		Disagree	12 (12%)	6 (11.5%)	7 (12.5%)	10 (7.9%)
	I understand AI concepts like: CNN Cross Validation, ROC AUC, Hyperparameters, Deep learning, Hidden Layers, etc.	Agree	8 (8%)	8 (15.4%)	8 (14.3%)	22 (17.5%)	0.21
		Neither agree nor disagree	11 (11%)	8 (15.4%)	12 (21.4%)	17 (13.5%)
		Disagree	81 (81%)	36 (69.2%)	36 (64.3%)	87 (69%)
	I can list some examples of recent clinically relevant	Agree	21 (21%)	9 (17.3%)	14 (25%)	28 (22.2%)	0.648
		Neither agree nor disagree	23 (23%)	7 (13.5%)	8 (14.3%)	22 (17.5%)
		Disagree	56 (56%)	36 (69.2%)	34 (60.7%)	76 (60.3%)
	I can list the strengths/benefits of using AI in medicine	Agree	73 (73%)	40 (76.9%)	40 (71.4%)	85 (67.5%)	0.785
		Neither agree nor disagree	18 (18%)	8 (15.4%)	8 (14.3%)	26 (20.6%)
		Disagree	9 (9%)	4 (7.7%)	8 (14.3%)	15 (11.9%)
	I can list the weaknesses/pitfalls of using AI in medicine.	Agree	72 (72%)	39 (75%)	43 (77%)	84 (67%)	0.64
		Neither agree nor disagree	19 (19%)	9 (17%)	6 (11%)	26 (21%)
		Disagree	9 (9%)	4 (8%)	7 (13%)	16 (13%)
	It's hard to understand and approach AI because of media sensationalism.	Agree	51 (51%)	32 (62%)	27 (48%)	69 (55%)	0.09
		Neither agree nor disagree	44 (44%)	12 (23%)	20 (36%)	42 (33%)
		Disagree	5 (5%)	8 (15%)	9 (16%)	15 (12%)
	I can separate “Hype” AI articles vs clinically relevant AI articles.	Agree	53 (53%)	27 (52%)	27 (48%)	54 (43%)	0.428
		Neither agree nor disagree	20 (20%)	15 (29%)	18 (32%)	37 (29%)
		Disagree	27 (27%)	10 (19%)	11 (20%)	35 (28%)
	I am worried about the ethics of using AI in medicine	Agree	69 (69%)	28 (54%)	39 (70%)	95 (75%)	0.146
		Neither agree nor disagree	21 (21%)	16 (31%)	12 (21%)	17 (14%)
		Disagree	10 (10%)	8 (15%)	5 (9%)	14 (11%)
	Some training on AI concepts and related topics during medical school can beuseful for my future career	Agree	90 (90%)	47 (90%)	46 (82%)	110 (87%)	0.828
		Neither agree nor disagree	8 (8%)	4 (8%)	7 (13%)	12 (10%)
		Disagree	2 (2%)	1 (2%)	3 (5%)	4 (3%)
	My school offers resources if I want to explore the topic of AI in medicine	Agree	14 (14%)	8 (15%)	8 (14%)	32 (25%)	0.17
		Neither agree nor disagree	45 (45%)	17 (33%)	20 (36%)	43 (34%)
		Disagree	41 (41%)	27 (52%)	28 (50%)	51 (41%)
	I want to learn what medical students should know about AI in medicine	Agree	92 (92%)	48 (92%)	49 (88%)	115 (91%)	0.889
		Neither agree nor disagree	6 (6%)	2 (4%)	4 (7%)	8 (6%)
		Disagree	2 (2%)	2 (4%)	3 (5%)	3 (2%)
	Learning the relevant topics of AI in medicine will significantly detract me from my medical school curriculum.	Agree	30 (30%)	17 (33%)	15 (27%)	34 (27%)	0.81
		Neither agree nor disagree	38 (38%)	17 (33%)	17 (30%)	41 (33%)
		Disagree	32 (32%)	18 (35%)	24 (43%)	51 (40%)
	Table (S4) Association between participants' past training in computer science and their KAPs towards AI.
	Statement	Likert response	Training in computor science
			Yes n=46 (100%)	No n=288 (100%)	P value
	AI will take on a significant role in medicine during my lifetime	Agree	44 (95.6%)	256 (88.8%)	0.36
		Neither agree nor disagree	1 (2.1%)	20 (6.9%)
		Disagree	1 (2.1%)	12 (4.1%)
	I am excited about using AI tech as a future physician	Agree	35 (76%)	203 (70.4%)	0.608
		Neither agree nor disagree	8 (17.3%)	53 (18.4%)
		Disagree	3 (6.5%)	32 (11.1%)
	I understand AI concepts like: CNN Cross Validation, ROC AUC, Hyperparameters, Deep learning, Hidden Layers, etc.	Agree	16 (34.7%)	30 (10.4%)	<0.001
		Neither agree nor disagree	12 (26%)	36 (12.5%)
		Disagree	18 (39.1%)	222 (77%)
	I can list some examples of recent clinically relevant	Agree	19 (41.3%)	53 (18.4%)	<0.001
		Neither agree nor disagree	10 (21.7%)	50 (17.3%)
		Disagree	17 (36.9%)	185 (64.2%)
	I can list the strengths/benefits of using AI in medicine	Agree	37 (80.4%)	201 (69.7%)	0.204
		Neither agree nor disagree	4 (8.6%)	56 (19.4%)
		Disagree	5 (10.8%)	31 (10.7%)
	I can list the weaknesses/pitfalls of using AI in medicine.	Agree	38 (82.6%)	200 (69.4%)	0.187
		Neither agree nor disagree	5 (10.8%)	55 (19%)
		Disagree	3 (6.5%)	33 (11.4%)
	It's hard to understand and approach AI because of media sensationalism.	Agree	21 (45.7%)	158 (54.8%)	0.274
		Neither agree nor disagree	17 (36.9%)	101 (35.1%)
		Disagree	8 (17.4%)	29 (10.1%)
	I can separate “Hype” AI articles vs clinically relevant AI articles.	Agree	30 (65.2%)	131 (45.4%)	0.023
		Neither agree nor disagree	11 (23.9%)	79 (27.4%)
		Disagree	5 (10.8%)	78 (27%)
	I am worried about the ethics of using AI in medicine	Agree	35 (76%)	196 (68%)	0.467
		Neither agree nor disagree	8 (17.3%)	58 (20.1%)
		Disagree	3 (6.5%)	34 (11.8%)
	Some training on AI concepts and related topics during medical school can beuseful for my future career	Agree	41 (89.1%)	252 (87.5%)	0.927
		Neither agree nor disagree	4 (8.6%)	27 (9.3%)
		Disagree	1 (2.1%)	9 (3.1%)
	My school offers resources if I want to explore the topic of AI in medicine	Agree	11 (23.9%)	51 (17.7%)	0.46
		Neither agree nor disagree	14 (30.4%)	111 (38.5%)
		Disagree	21 (45.6%)	126 (43.7%)
	I want to learn what medical students should know about AI in medicine	Agree	41 (89.1%)	263 (91.3%)	0.672
		Neither agree nor disagree	4 (8.6%)	16 (5.5%)
		Disagree	1 (2.1%)	9 (3.1%)
	Learning the relevant topics of AI in medicine will significantly detract me from my medical school curriculum.	Agree	14 (30.4%)	111 (38.5%)	0.569
		Neither agree nor disagree	17 (36.9%)	96 (33.3%)
		Disagree	15 (32.6%)	81 (28.1%)
	Table (S5) Association between participants' father’s education and their KAPs towards AI.
	Statement	Likert response	Father’s Degree
			School n=17 (100%)	University n=104 (100%)	Post-Grad n=203 (100%)	P value
	AI will take on a significant role in medicine during my lifetime	Agree	13 (76.4%)	101 (88.5%)	186 (91%)	0.307
		Neither agree nor disagree	2 (11.7%)	8 (7%)	11 (5.4%)
		Disagree	2 (11.7%)	5 (4.3%)	6 (2.9%)
	I am excited about using AI tech as a future physician	Agree	10 (58.8%)	75 (65.7%)	153 (75.3%)	0.12
		Neither agree nor disagree	5 (29.4%)	28 (24.5%)	28 (13.7%)
		Disagree	2 (11.7%)	11 (9.6%)	22 (10.8%)
	I understand AI concepts like: CNN Cross Validation, ROC AUC, Hyperparameters, Deep learning, Hidden Layers, etc.	Agree	6 (35.2%)	16 (14%)	24 (11.8%)	0.104
		Neither agree nor disagree	1 (5.8%)	16 (14%)	31 (15.2%)
		Disagree	10 (58.8%)	82 (71.9%)	148 (72.9%)
	I can list some examples of recent clinically relevant	Agree	2 (11.7%)	24 (21%)	46 (22.6%)	0.073
		Neither agree nor disagree	4 (23.5%)	28 (24.5%)	27 (13.3%)
		Disagree	11 (64.7%)	61 (53.5%)	130 (64%)
	I can list the strengths/benefits of using AI in medicine	Agree	11 (64.7%)	86 (78%)	141 (69.4%)	0.543
		Neither agree nor disagree	5 (29.4%)	17 (14.9%)	38 (18.7%)
		Disagree	1 (5.8%)	11 (9.6%)	24 (11.8%)
	I can list the weaknesses/pitfalls of using AI in medicine.	Agree	10 (58.8%)	88 (77.1%)	140 (68.9%)	0.033
		Neither agree nor disagree	7 (41.1%)	14 (12.2%)	39 (19.2%)
		Disagree	0	12 (10.5%)	24 (11.8%)
	It's hard to understand and approach AI because of media sensationalism.	Agree	6 (35.2%)	64 (56.1%)	109 (53.6%)	0.343
		Neither agree nor disagree	9 (52.9%)	41 (35.9%)	68 (33.4%)
		Disagree	2 (11.7%)	9 (07.8%)	26 (12.8%)
	I can separate “Hype” AI articles vs clinically relevant AI articles.	Agree	8 (47%)	63 (55.2%)	90 (44.3%)	0.468
		Neither agree nor disagree	5 (29.4%)	26 (22.8%)	59 (29%)
		Disagree	4 (23.5%)	25 (21.9%)	54 (26.6%)
	I am worried about the ethics of using AI in medicine	Agree	11 (64.7%)	90 (78.9%)	130 (64%)	0.006
		Neither agree nor disagree	3 (17.6%)	10 (8.7%)	53 (26.1%)
		Disagree	3 (17.6%)	14 (12.2%)	20 (9.8%)
	Some training on AI concepts and related topics during medical school can beuseful for my future career	Agree	13 (76.4%)	102 (89.4%)	181 (89.1%)	0.25
		Neither agree nor disagree	2 (11.7%)	10 (8.7%)	19 (9.3%)
		Disagree	2 (11.7%)	2 (1.7%)	6 (2.9%)
	My school offers resources if I want to explore the topic of AI in medicine	Agree	2 (11.7%)	25 (21.9%)	35 (17.2%)	0.525
		Neither agree nor disagree	9 (52.9%)	42 (36.8%)	74 (36.4%)
		Disagree	6 (35.2%)	47 (41.2%)	94 (46.3%)
	I want to learn what medical students should know about AI in medicine	Agree	16 (94.1%)	102 (89.4%)	186 (91.6%)	0.548
		Neither agree nor disagree	0 (0%)	7 (6.1%)	13 (6.4%)
		Disagree	1 (5.8%)	5 (4.3%)	4 (1.9%)
	Learning the relevant topics of AI in medicine will significantly detract me from my medical school curriculum.	Agree	5 (29.4%)	27 (23.6%)	64 (31.5%)	0.664
		Neither agree nor disagree	5 (29.4%)	41 (35.9%)	67 (33.0%)
		Disagree	7 (41.1%)	46 (40.3%)	72 (35.4%)
	Table (S6) Association between participants' mother’s education and their KAPs towards AI.
	Statement	Likert response	Mother’s Degree
			School n=17 (100%)	University n=150 (100%)	Post-Grad n=167 (100%)	P value
	AI will take on a significant role in medicine during my lifetime	Agree	14 (82.3%)	136 (90.6%)	150 (89.8%)	0.263
		Neither agree nor disagree	1 (5.8%)	7 (4.6%)	13 (7.7%)
		Disagree	2 (11.7%)	7 (4.6%)	4 (2.3%)
	I am excited about using AI tech as a future physician	Agree	11 (64.7%)	104 (69.3%)	123 (73.6%)	0.867
		Neither agree nor disagree	4 (23.5%)	30 (20%)	27 (16.1%)
		Disagree	2 (11.7%)	16 (10.6%)	17 (10.1%)
	I understand AI concepts like: CNN Cross Validation, ROC AUC, Hyperparameters, Deep learning, Hidden Layers, etc.	Agree	4 (23.5%)	21 (14%)	21 (12.5%)	0.321
		Neither agree nor disagree	3 (17.6%)	16 (10.6%)	29 (17.3%)
		Disagree	10 (58.8%)	113 (75.3%)	117 (70%)
	I can list some examples of recent clinically relevant	Agree	4 (23.5%)	36 (24%)	32 (19.1%)	0.552
		Neither agree nor disagree	5 (29.4%)	26 (17.3%)	29 (17.3%)
		Disagree	8 (47%)	88 (58.6%)	106 (63.5%)
	I can list the strengths/benefits of using AI in medicine	Agree	13 (76.4%)	114 (76%)	111 (66.4%)	0.338
		Neither agree nor disagree	3 (17.6%)	24 (16%)	33 (19.7%)
		Disagree	1 (5.8%)	12 (8%)	23 (13.7%)
	I can list the weaknesses/pitfalls of using AI in medicine.	Agree	10 (58.8%)	124 (82.6%)	104 (62.2%)	<0.001
		Neither agree nor disagree	6 (35.2%)	18 (12%)	36 (21.5%)
		Disagree	1 (5.8%)	8 (5.3%)	27 (16.1%)
	It's hard to understand and approach AI because of media sensationalism.	Agree	6 (35.2%)	84 (56%)	89 (53.2%)	0.294
		Neither agree nor disagree	10 (58.8%)	51 (34%)	57 (34.1%)
		Disagree	1 (5.8%)	15 (10%)	21 (12.5%)
	I can separate “Hype” AI articles vs clinically relevant AI articles.	Agree	7 (41.1%)	81 (54%)	73 (43.7%)	0.375
		Neither agree nor disagree	6 (35.2%)	34 (22.6%)	50 (29.9%)
		Disagree	4 (23.5%)	35 (23.3%)	44 (26.3%)
	I am worried about the ethics of using AI in medicine	Agree	10 (58.8%)	110 (73.3%)	111 (66.4%)	0.483
		Neither agree nor disagree	4 (23.5%)	24 (16%)	38 (22.7%)
		Disagree	3 (17.6%)	16 (10.6%)	16 (9.5%)
	Some training on AI concepts and related topics during medical school can beuseful for my future career	Agree	14 (82.3%)	137 (91.3%)	142 (85%)	0.286
		Neither agree nor disagree	3 (17.6%)	10 (6.6%)	18 (10.7%)
		Disagree	0	3 (2%)	7 (4.1%)
	My school offers resources if I want to explore the topic of AI in medicine	Agree	0 (0%)	32 (21.3%)	30 (17.9%)	0.183
		Neither agree nor disagree	10 (58.8%)	52 (34.6%)	63 (37.7%)
		Disagree	7 (41.1%)	66 (44%)	74 (44.3%)
	I want to learn what medical students should know about AI in medicine	Agree	17 (100%)	138 (92%)	149 (89.2%)	0.642
		Neither agree nor disagree	0 (0%)	8 (5.3%)	12 (7.1%)
		Disagree	0 (0%)	4 (2.6%)	6 (3.5%)
	Learning the relevant topics of AI in medicine will significantly detract me from my medical school curriculum.	Agree	4 (23.5%)	36 (24%)	56 (33.5%)	0.408
		Neither agree nor disagree	6 (35.2%)	56 (37.3%)	51 (30.5%)
		Disagree	7 (41.1%)	58 (38.6%)	60 (35.9%)
